# Supplementary material for: Six Novel Mycoviruses Containing Positive Single-Stranded RNA and Double-Stranded RNA Genomes Co-Infect a Single Strain of the Rhizoctonia solani AG-3 PT
Source: MDPI journal article supplement (doi:10.3390/v14040813), 2022-04-14
Supplement: s1 [file s1]

**Table S5.** The reference viruses of families *Hypoviridae*, *Mitoviridae*, *Narnaviridae*, *Partitiviridae*, *Megabinaviridae*, and *Totiviridae*, and proposed families *Fusariviridae* and *Bipartitiviridae*, which were retrieved from GenBank and used to conduct phylogenetic analysis.

| Family               | Name of the Reference Viruses                              | Abbreviation | Host                               | GenBank Accession Numbers |
|----------------------|------------------------------------------------------------|--------------|------------------------------------|---------------------------|
| <i>Fusariviridae</i> | <i>Neurospora crassa</i> fusarivirus 1-JW222               | NcFV1-JW222  | <i>Neurospora crassa</i>           | BCL64190.1                |
|                      | <i>Neurospora intermedia</i> fusarivirus 1                 | NiFV1        | <i>Neurospora intermedia</i>       | BCB17077.1                |
|                      | <i>Neurospora crassa</i> fusarivirus 1-JW45                | NcFV1-JW45   | <i>Neurospora crassa</i>           | LC586023                  |
|                      | <i>Neurospora crassa</i> fusarivirus 1- JW164              | NcFV1-JW164  | <i>Neurospora crassa</i>           | LC586023                  |
|                      | <i>Neurospora discreta</i> fusarivirus 2-W683              | NdFV2-W683   | <i>Neurospora discreta</i>         | BCL64194.1                |
|                      | <i>Nigrospora oryzae</i> fusarivirus 1                     | NoFV1        | <i>Nigrospora oryzae</i>           | KU980909                  |
|                      | <i>Sclerotinia sclerotiorum</i> fusarivirus 1              | SsFV1        | <i>Sclerotinia sclerotiorum</i>    | YP_009143301.1            |
|                      | <i>Alternaria brassicicola</i> fusarivirus 1               | AbFV1        | <i>Alternaria brassicicola</i>     | YP_009222009.1            |
|                      | <i>Alternaria alternata</i> fusarivirus 1                  | AaFV1        | <i>Alternaria alternata</i>        | BBD71147.1                |
|                      | <i>Botrytis cinerea</i> fusarivirus 1                      | BcFV1        | <i>Botrytis cinerea</i>            | YP_009480678.1            |
|                      | <i>Rhizoctonia solani</i> fusarivirus virus 2              | RsFV2        | <i>Rhizoctonia solani</i>          | MK558256.1                |
|                      | <i>Rhizoctonia solani</i> fusarivirus virus 1              | RsFV1        | <i>Rhizoctonia solani</i>          | QDW92695.1                |
|                      | <i>Rhizoctonia solani</i> fusarivirus virus 3              | RsFV3        | <i>Rhizoctonia solani</i>          | MK558258.1                |
|                      | <i>Macrophomina phaseolina</i> single-stranded RNA virus 1 | MpRV1        | <i>Macrophomina phaseolina</i>     | KP900890                  |
|                      | <i>Penicillium aurantiogriseum</i> fusarivirus 1           | PaFV1        | <i>Penicillium aurantiogriseum</i> | NC_028467                 |
|                      | <i>Penicillium roqueforti</i> ssRNA mycovirus 1            | PrMV1        | <i>Penicillium roqueforti</i>      | NC_024699                 |
|                      | <i>Fusarium graminearum</i> dsRNA mycovirus 1              | FgV1         | <i>Fusarium graminearum</i>        | NC_006937                 |
|                      | <i>Pleospora typhicola</i> fusarivirus 1                   | PtFV1        | <i>Pleospora typhicola</i>         | NC_028470                 |
|                      | <i>Rosellinia necatrix</i> fusarivirus 1                   | RnFV1        | <i>Rosellinia necatrix</i>         | YP_009047147.1            |
|                      | <i>Fusarium poae</i> fusarivirus 1                         | FpFV1        | <i>Fusarium poae</i>               | YP_009272906.1            |
|                      | <i>Neurospora discreta</i> fusarivirus 1-W683              | NdFV1-W683   | <i>Neurospora discreta</i>         | BCL64192.1                |
| <i>Hypoviridae</i>   | <i>Cryphonectria hypovirus</i> 1                           | CHV1         | <i>Cryphonectria parasitica</i>    | NP_041091.1               |

|                    |                                                    |             |                                 |                |
|--------------------|----------------------------------------------------|-------------|---------------------------------|----------------|
|                    | Cryphonectria hypovirus 2                          | CHV2        | <i>Cryphonectria parasitica</i> | AAA20137.1     |
|                    | Rhizoctonia solani mitovirus 11                    | RsMV11      | Rhizoctonia solani              | ALD89116.1     |
|                    | Rhizoctonia solani mitovirus 34                    | RsMV34      | Rhizoctonia solani              | QDW65424.1     |
|                    | Soybean leaf-associated mitovirus 1                | SlaMV1      | Soybean phyllosphere fungi      | ALM62241.1     |
|                    | Rhizoctonia solani mitovirus 2                     | RsMV2       | Rhizoctonia solani              | ALD89121.1     |
|                    | Botryosphaeria dothidea mitovirus 1                | BdMV1       | Botryosphaeria dothidea         | QMU24933.1     |
|                    | Buergenerula spartinae mitovirus 1                 | BsMV1       | Buergenerula spartinae          | AHY03257.1     |
|                    | Setosphaeria turcica mitovirus 1                   | StMV1       | Setosphaeria turcica            | AZT88625.1     |
|                    | Plasmopara viticola lesion associated mitovirus 43 | PvaMV43     | Plasmopara viticola             | QIR30266.1     |
|                    | Plasmopara viticola lesion associated mitovirus 46 | PvaMV46     | Plasmopara viticola             | QIR30269.1     |
|                    | Sclerotinia sclerotiorum mitovirus 7-A             | SsMV7-A     | Sclerotinia sclerotiorum        | AWY10969.1     |
|                    | Fusarium poae mitovirus 4                          | FpMV4       | Fusarium poae                   | YP_009272901.1 |
|                    | Botrytis cinerea mitovirus 1                       | BcMV1       | Botrytis cinerea                | CEZ26300.1     |
| <i>Mitoviridae</i> | Bremia lactucae associated mitovirus 1             | BlaMV1      | Bremia lactucae                 | QIP68024.1     |
|                    | Sclerotinia sclerotiorum mitovirus 3-NZ1           | SsMV3/NZ1   | Sclerotinia sclerotiorum        | AGC24232       |
|                    | Sclerotinia sclerotiorum mitovirus 12              | SsMV12      | Sclerotinia sclerotiorum        | AHF48628.1     |
|                    | Macrophomina phaseolina mitovirus 1                | MpMV1       | Macrophomina phaseolina         | ALD89100.1     |
|                    | Sclerotinia sclerotiorum mitovirus 6-14563         | SsMV6/14563 | Sclerotinia sclerotiorum        | AHX84133       |
|                    | Rhizoctonia solani mitovirus 35                    | RsMV35      | Rhizoctonia solani              | QDW80891.1     |
|                    | Fusarium boothii mitovirus 1                       | FbMV1       | Fusarium boothii                | BBG56022.1     |
|                    | Fusarium poae mitovirus 3                          | FpMV3       | Fusarium poae                   | YP_009272900.1 |
|                    | Alternaria alternata mitovirus 1                   | AaMV1       | Alternaria alternata            | QDB74990.1     |
|                    | Rhizoctonia solani mitovirus 38                    | RsMV38      | Rhizoctonia solani              | QDW65426.1     |
|                    | Epicoccum nigrum mitovirus 1                       | EnMV1       | Epicoccum nigrum                | QDB74989.1     |
|                    | Rhizoctonia solani mitovirus 22                    | RsMV22      | Rhizoctonia solani              | QDW80890.1     |
|                    | Ophiostoma mitovirus 7                             | OnuMV7      | Ophiostoma novo-ulmi            | KF031943.1     |

|                           |                                                |             |                             |                |
|---------------------------|------------------------------------------------|-------------|-----------------------------|----------------|
|                           | Rhizoctonia mitovirus 1                        | RsMV1       | Rhizoctonia solani          | AHL25281       |
|                           | Tuber excavatum mitovirus                      | TeMV        | Tuber excavatum             | AEP83726       |
|                           | Sclerotinia sclerotiorum mitovirus 2-KL-1      | SsMV2/KL-1  | Sclerotinia sclerotiorum    | AEX91879       |
|                           | Sclerotinia sclerotiorum mitovirus 4-NZ1       | SsMV4/NZ1   | Sclerotinia sclerotiorum    | AGC24233       |
|                           | Sclerotinia sclerotiorum mitovirus 1-KL-1      | SsMV1/KL-1  | Sclerotinia sclerotiorum    | AEX91878       |
|                           | Sclerotinia sclerotiorum mitovirus 5-11691     | SsMV5/11691 | Sclerotinia sclerotiorum    | AHX84130       |
| <i>Narnaviridae</i>       | Saccharomyces 23S RNA narnavirus               | ScNV23s     | Saccharomyces cerevisiae    | NP_660177      |
|                           | Saccharomyces 20S RNA narnavirus               | ScNV20s     | Saccharomyces cerevisiae    | NP_660178      |
| Proposed Bipartitiviridae | Cryphonectria parasitica bipartite mycovirus 1 | CpBV1       | Cryphonectria parasitica    | YP_007985675.1 |
|                           | Botryosphaeria dothidea bipartite mycovirus 1  | BdBMV1      | Botryosphaeria dothidea     | QUP79399.1     |
|                           | Curvularia virus 2                             | CuV2        | Curvularia                  | ALO61392.1     |
|                           | Corynespora cassiicola bipartite mycovirus 1   | CcBMV1      | Corynespora cassiicola      | QNC69629.1     |
|                           | Trichoderma harzianum bipartite mycovirus 1    | ThBV1       | Trichoderma harzianum       | YP_009553330.1 |
|                           | Trichoderma harzianum bipartite mycovirus 1    | ThBMV1      | Trichoderma harzianum       | AXU24203.1     |
|                           | Curvularia thermal tolerance virus             | CtTV        | Curvularia                  | YP_001976143.1 |
|                           | Myriodontium keratinophilum bipartite virus 1  | MkBV1       | Myriodontium keratinophilum | AYP71809.1     |
|                           | Penicillium aurantiogriseum bipartite virus 1  | PaBV1       | Penicillium aurantiogriseum | YP_009182335.1 |
|                           | Sclerotium hydrophilum virus 1                 | ShV1        | Sclerotium hydrophilum      | YP_009273017.1 |
|                           | Lactarius tabidus RNA virus 1                  | LtRV1       | Lactarius tabidus           | AMK47915.3     |
|                           | Gremmeniella abietina RNA virus 6              | GaRV6       | Gremmeniella abietina       | AIU98624.1     |
|                           | Fusarium graminearum dsRNA mycovirus 5         | FgRV5       | Fusarium graminearum        | APP91269.1     |
|                           | Fusarium graminearum dsRNA mycovirus 4         | FgRV4       | Fusarium graminearum        | YP_003288790.1 |
|                           | Heterobasidion RNA virus 6                     | HeRV6       | Heterobasidion annosum      | ADW82833.1     |
|                           | Sclerotium rolfsii unassigned dsRNA virus 2    | SrRV2       | Sclerotium rolfsii          | AZF86116.1     |
|                           | Sclerotium rolfsii unassigned dsRNA virus 1    | SrRV1       | Sclerotium rolfsii          | AZF86115.1     |
|                           | Rhizoctonia fumigata mycovirus                 | RfMV        | Rhizoctonia fumigata        | YP_009134757.1 |

|                       |                                           |         |                           |                |
|-----------------------|-------------------------------------------|---------|---------------------------|----------------|
|                       | Rhizoctonia solani dsRNA virus 1          | RsRV1   | Rhizoctonia solani        | AFZ85210.1     |
|                       | Rhizoctonia solani mycovirus 2            | RsMV2   | Rhizoctonia solani        | ANR02696.1     |
|                       | Rhizoctonia solani bipartite-like virus 1 | RsBLV1  | Rhizoctonia solani        | QDW81299.1     |
|                       | Ceratobasidium mycovirus-like             | CeMVL   | Ceratobasidium sp.        | AOX47586.1     |
| <i>Partitiviridae</i> | Ustilaginoidea virens partitivirus 3      | UvPV3   | Ustilaginoidea virens     | YP_008327312.1 |
|                       | Ustilaginoidea virens partitivirus 2      | UvPV2   | Ustilaginoidea virens     | YP_008327313.1 |
|                       | Fusarium solani virus 1                   | FsV1    | Fusarium solani           | BAA09520.1     |
|                       | Gremmeniella abietina RNA virus MS1       | GaRVMS1 | Gremmeniella abietina     | AAM12240.1     |
|                       | Penicillium stoloniferum virus S          | PsVS    | Penicillium stoloniferum  | CAJ01909.1     |
|                       | Aspergillus fumigatus partitivirus 1      | AfPV1   | Aspergillus fumigatus     | CAY25801.2     |
|                       | Fusarium poae virus 1                     | FpV1    | Fusarium poae             | AAC98734.1     |
|                       | Rhizoctonia solani virus 717              | RsV717  | Rhizoctonia solani        | AAF22160.1     |
|                       | Sclerotinia sclerotiorum partitivirus 1   | SsPV1   | Sclerotinia sclerotiorum  | AFR78160.1     |
|                       | Rosellinia necatrix partitivirus 3        | RnPV3   | Rosellinia necatrix       | BAM36401.1     |
|                       | Rosellinia necatrix partitivirus 4        | RnPV4   | Rosellinia necatrix       | BAM36402.1     |
|                       | Heterobasidion partitivirus 2             | HePV2   | Heterobasidion parviporum | ADL66905.1     |
|                       | Rosellinia necatrix partitivirus 2        | RnPV2   | Rosellinia necatrix       | BAM78602.1     |
|                       | Vicia faba partitivirus 1                 | VfPV1   | Vicia faba                | ABJ99996.1     |
|                       | Sclerotinia sclerotiorum partitivirus S   | SsPVS   | Sclerotinia sclerotiorum  | YP_003082248.1 |
|                       | Heterobasidion partitivirus 3             | HePV3   | Heterobasidion ecrustosum | ACO37245.1     |
|                       | Heterobasidion partitivirus 1             | HePV1   | Heterobasidion abietinum  | ADV15441.1     |
|                       | Rhizoctonia fumigata partitivirus         | RfPV    | Rhizoctonia fumigata      | AJE25830.1     |
|                       | Gaeumannomyces tritici partitivirus 2     | GtPV2   | Gaeumannomyces tritici    | AZT88604.1     |
|                       | Raphanus sativus cryptic virus 4          | RsCV4   | Raphanus sativus          | ATG29853.1     |
|                       | Vicia cryptic virus                       | VCV     | Vicia faba                | ABN71239.1     |
|                       | Beet cryptic virus 1                      | BCV1    | Beta vulgaris             | ACA81389.1     |

|                        |                                           |         |                             |                |
|------------------------|-------------------------------------------|---------|-----------------------------|----------------|
|                        | White clover cryptic virus 1              | WCCV1   | white clover                | AAU14888.1     |
|                        | Red clover cryptic virus 1                | RccV1   | Red clover                  | YP_008719882.1 |
|                        | Fig cryptic virus                         | FcV     | Fig                         | CBW77436.1     |
|                        | Beet cryptic virus 3                      | BcV3    | Beet                        | AAB27624.1     |
|                        | Pepper cryptic virus 2                    | PcV2    | Pepper                      | AEJ07892.1     |
|                        | Beet cryptic virus 2                      | BcV2    | Beet                        | ADP24757.1     |
|                        | Pepper cryptic virus 1                    | PcV1    | Pepper                      | AEJ07890.1     |
| <i>Megabinaviridae</i> | Botrytis porri botybirnavirus 1           | BpBV1   | Botrytis porri              | AFD04798.1     |
|                        | Rosellinia necatrix megabirnavirus 1      | RnMBV1  | Rosellinia necatrix         | BAI48016.1     |
|                        | Pleosporales megabirnavirus 1             | PmBV1   | Pleosporales sp.            | ALO50147.1     |
|                        | Sclerotinia sclerotiorum megabirnavirus 1 | SsMBV1  | Sclerotinia sclerotiorum    | YP_009143529.1 |
| <i>Totiviridae</i>     | Botryotinia fuckeliana totivirus 1        | BfTV1   | Botryotinia fuckeliana      | YP_001109580.1 |
|                        | Gremmeniella abietina RNA virus L1        | GaRvL1  | Gremmeniella abietina       | NP_624332.2    |
|                        | Gremmeniella abietina RNA virus L2        | GaRvL2  | Gremmeniella abietina       | YP_044807.1    |
|                        | Aspergillus mycovirus 178                 | AsMV178 | Aspergillus nidulans        | ABX79995.1     |
|                        | Penicillium aurantiogriseum totivirus 1   | PaTV1   | Penicillium aurantiogriseum | YP_009212848.1 |
|                        | Magnaporthe oryzae virus 2                | MoV2    | Magnaporthe oryzae          | YP_001649206.1 |
|                        | Sphaeropsis sapinea RNA virus 2           | SsRV2   | Sphaeropsis sapinea         | NP_047560.1    |
