# Supplementary material for: Six Novel Mycoviruses Containing Positive Single-Stranded RNA and Double-Stranded RNA Genomes Co-Infect a Single Strain of the Rhizoctonia solani AG-3 PT
Source: MDPI journal article supplement (doi:10.3390/v14040813), 2022-04-14
Supplement: s1 [file s1]

**Table S1.** Primer pairs designed on the basis of the nucleotide sequences of RNA dependent RNA polymerase (RdRp), coat protein (CP), or hypothetical protein (HP) in the six mycoviruses (Rhizoctonia solani mitovirus 40, Rhizoctonia solani fusarivirus 4, Rhizoctonia solani fusarivirus 5, Rhizoctonia solani parititivirus 10, Rhizoctonia solani parititivirus 11, and Rhizoctonia solani RNA virus 11). The primer pairs were used to confirm the presence of viral sequences in *Rhizoctonia solani* AG-3 PT strain ZJ-2H.

| Primer Name | Sequence (5'-3')           | Confirmed Viruses                            | Contig ID     | Target Gene | Fragment Size (nt) | Annealing Temperature (°C) |
|-------------|----------------------------|----------------------------------------------|---------------|-------------|--------------------|----------------------------|
| RsMV40-F    | TACGGGATAAGAAGAACGAACAGC   | Rhizoctonia solani mitovirus 40 (RsMV40)     | First_contig5 | RdRp        | 768                | 56                         |
| RsMV40-R    | AAGACCAAGACCAGGCCCAAT      |                                              |               |             |                    | 54                         |
| RsFV4-F     | GCACAAAACGCTGCCCAATACT     | Rhizoctonia solani fusarivirus 4 (RsFV4)     | contig978     | HP          | 527                | 55                         |
| RsFV4-R     | CTGCACGCGATAGGATGCATGT     |                                              |               |             |                    | 57                         |
| RsFV5-F     | CAATGGTCTGTGGGCTGTTGG      | Rhizoctonia solani fusarivirus 5 (RsFV5)     | contig6043    | RdRp        | 669                | 56                         |
| RsFV5-R     | ATTGGAGGTACGTCCGGTTCG      |                                              |               |             |                    | 56                         |
| RsPV10-Rd-F | ATCGTCACCTTGGACTTTG        | Rhizoctonia solani parititivirus 10 (RsPV10) | contig3112    | RdRp        | 504                | 49                         |
| RsPV10-Rd-R | GAATACATCGCCTGGGTAA        |                                              |               |             |                    | 49                         |
| RsPV10-CP-F | CATAAGGAACCTGGCTGTCTG      |                                              | contig1221    | CP          | 516                | 52                         |
| RsPV10-CP-R | ACAAAGAATGCGGAACCTCTC      |                                              |               |             |                    | 50                         |
| RsPV11-Rd-F | GGAAAGTATCATCGTACCATCCCTCG | Rhizoctonia solani parititivirus 11 (RsPV11) | contig644     | RdRp        | 501                | 60                         |
| RsPV11-Rd-R | AACGTCCGTAGCTGTGAGTCCTG    |                                              |               |             |                    | 59                         |
| RsPV11-CP-F | AAGGCTTGTCGGCTCTACA        |                                              | contig315     | CP          | 587                | 51                         |
| RsPV11-CP-R | TACCGTGCTGGTTCATCAC        |                                              |               |             |                    | 51                         |

|             |                          |                                                |             |      |     |    |
|-------------|--------------------------|------------------------------------------------|-------------|------|-----|----|
| RsRV11-Rd-F | TTCATCAAGAAGCATCAAGCC    | Rhizoctonia solani<br>RNA virus 11<br>(RsRV11) | contig14243 | RdRp | 690 | 50 |
| RsRV11-Rd-R | CTCACCACCACGCATAATACC    |                                                |             |      |     | 54 |
| RsRV11-HP-F | GCCAAGACCTCACAAACGG      | (RsRV11)                                       | contig11433 | HP   | 972 | 53 |
| RsRV11-HP-R | ACACCCAAACAATAGAACAAAAGA |                                                |             |      |     | 51 |
