# Supplementary material for: Six Novel Mycoviruses Containing Positive Single-Stranded RNA and Double-Stranded RNA Genomes Co-Infect a Single Strain of the Rhizoctonia solani AG-3 PT
Source: MDPI journal article supplement (doi:10.3390/v14040813), 2022-04-14
Supplement: s1 [file s1]

# A

## RsPV10

5'-UTRs dsRNA1 SGATCAAGTTTATCAGAAACCCAGCGAAAGCCCCCAATACAAAGCTTTAGCCACAGAATTCTTTCTGTCCTGAGAAAACTACTACTTATGGATTACT.....  
 dsRNA2 SGATCAAGTTTATCAGAAACCCAGCGAAAGCCCCCAATACAAAGCTTTAGCCACAGAATTCTTTCTGTCCTGAGAAAACTACTACTTACATCPACAGTACAA  
 \*\*\*\*\*

3'-UTRs dsRNA1 TCTTTTTTTTAAATCAAAACAAAACAAAATAAACAGAAAAAAAAAAAAAAAAAAAAAAAAAAAAA  
 dsRNA2 TCTTTTTTTTAAATCAAAACAAAACAAAATAAACAGAAAAAAAAAAAAAAAAAAAAAAAAAAAAA  
 \*\*\*

# B

## RsPV11

5'-UTRs dsRNA1 GAACAAAGTGACCCACAGTTTATTAATCTCTCTGTTCTGAACCTCCAAACGATTTTCTTGCCTGCAACACTTACTACTTACTACCCCTCTACAAATGGAGCACTGCCACATCTCTTGACAA  
 dsRNA2 GAACAAAGTGATCGACTTGTGTTAGCCAAATCTTCTCTGAACCTCCAAACGATTTTCAAGCTCGCAACACTTACTACTTACTACCCCTCTCTGTGTACACATGGATACCACTCTCTGTGCA  
 \*\*\*\*\*

3'-UTRs dsRNA1 TTTCTTTTATCTTCTCGAATTTTACTATTTTATTTTCAAAAGCAAAAAAAAAAAAAAAAAAAAAAAAAAAAAA  
 dsRNA2 TTTCTTTTATCTTCTCGAATTTTAAATCAAAACAAAATAAACAGAAAAAAAAAAAAAAAAAAAAAAAAAAAAA  
 \* \* \* \* \*
