# Supplementary material for: Six Novel Mycoviruses Containing Positive Single-Stranded RNA and Double-Stranded RNA Genomes Co-Infect a Single Strain of the Rhizoctonia solani AG-3 PT
Source: MDPI journal article supplement (doi:10.3390/v14040813), 2022-04-14
Supplement: s1 [file s1]

**Table S2.** Primers used to validate the nucleotide sequences in the six mycoviruses (Rhizoctonia solani mitovirus 40, Rhizoctonia solani fusarivirus 4, Rhizoctonia solani fusarivirus 5, Rhizoctonia solani paritivirus 10, Rhizoctonia solani paritivirus 11, and Rhizoctonia solani RNA virus 11) based on the sequences obtained through metatranscriptome analysis of *Rhizoctonia solani* AG-3 PT strain ZJ-2H.

| <b>Mycovirus Name</b>                    | <b>Primer Name</b> | <b>Sequence (5'-3')</b>     | <b>The Region of Polymerase Chain Reaction Product at Viral Genome (nt)</b> | <b>Annealing Temperature (°C)</b> |
|------------------------------------------|--------------------|-----------------------------|-----------------------------------------------------------------------------|-----------------------------------|
| Rhizoctonia solani mitovirus 40 (RsMV40) | RsMV40-1F          | CTGATCTCCGCCCCGTGTC         | 28-640                                                                      | 55                                |
|                                          | RsMV40-1R          | TCCCGTAAGCCAATCTACCTAT      |                                                                             | 53                                |
|                                          | RsMV40-2F          | GAATAGGTAGATTGGCTTACGGG     | 638-1372                                                                    | 55                                |
|                                          | RsMV40-2R          | GCTCTAAGCGAATCTTTGGTTTT     |                                                                             | 52                                |
|                                          | RsMV40-3F          | GTTGACAAACGGTCTGCCTAA       | 638-1799                                                                    | 52                                |
|                                          | RsMV40-3R          | GCTGCCCTACCTCGTAAAAGT       |                                                                             | 54                                |
|                                          | RsMV40-4F          | AAGTCAAGACAAGGCTATCAAGG     | 1587-2523                                                                   | 53                                |
|                                          | RsMV40-4R          | TGGCAACTTATACTCAAGCGAC      |                                                                             | 53                                |
| Rhizoctonia solani fusarivirus 4 (RsFV4) | RsFV4-1F           | CGGGTCAGAGTCCGTTTTTCG       | 881-1500                                                                    | 56                                |
|                                          | RsFV4-1R           | TCGGTCTTCCTCGGTTGTTTT       |                                                                             | 52                                |
|                                          | RsFV4-2F           | CATACACGGCAACATTCCACG       | 1679-2642                                                                   | 54                                |
|                                          | RsFV4-2R           | GACCAAGTCATCATCTTACTGTCATCA |                                                                             | 57                                |
|                                          | RsFV4-3F           | AAGAGCGCCCTGTGCCTCAC        | 2416-3311                                                                   | 58                                |
|                                          | RsFV4-3R           | GCTTGACAAGTCGCCAACCCA       |                                                                             | 56                                |
|                                          | RsFV4-4F           | GGCTATTTCTGGCTGACGAGCTC     | 3935-4828                                                                   | 59                                |
|                                          | RsFV4-4R           | AATTCCTAAGAACCTTCGCGTATTAA  |                                                                             | 54                                |
|                                          | RsFV4-5F           | GGAGGCTTACGAAAACAAACCG      | 3581-4502                                                                   | 55                                |

|                                             |           |                                      |            |    |
|---------------------------------------------|-----------|--------------------------------------|------------|----|
| Rhizoctonia solani<br>fusarivirus 5 (RsFV5) | RsFV4-5R  | TGTCAAGATGAGACGAACCCAGA              | 4141-5013  | 55 |
|                                             | RsFV4-6F  | TTAGCGTTGGCTCTATCCCTCT               |            | 55 |
|                                             | RsFV4-6R  | CCTTCGTAATCTTTGACCTTTTCG             |            | 54 |
|                                             | RsFV4-7F  | GGTCAAAGATTACGAAGGCAAAC              | 5019-5966  | 53 |
|                                             | RsFV4-7R  | CCCAAGTACAAAGCAACCATCACTAGAGAGTTAT   |            | 62 |
|                                             | RsFV4-8F  | ACATCACATACCATGACCCGC                | 6302-7211  | 54 |
|                                             | RsFV4-8R  | GAGCCACCAAATCACGAAAC                 |            | 52 |
|                                             | RsFV4-9F  | GTTTTTCGTGATTTGGTGGCTC               | 7211-8105  | 52 |
|                                             | RsFV4-9R  | CTGGCTCTTCAATTTCTAGTTGCT             |            | 54 |
|                                             | RsFV4-10F | GAGTGACCGTGAGTGATGTGGA               | 7940-8876  | 57 |
|                                             | RsFV4-10R | GGCTTTTAGGCTTTTGCGTG                 |            | 52 |
|                                             | RsFV4-11F | CGCAAAAGCCTAAAAGCCC                  | 8878-9754  | 51 |
|                                             | RsFV4-11R | GTCACAACAGCCCAACAAACAC               |            | 55 |
|                                             | RsFV4-12F | TTCCAGTGCCAAGACCAAAAT                | 9629-10435 | 50 |
|                                             | RsFV4-12R | AACAGGCGCAACCTCTAAAGAC               |            | 55 |
|                                             | RsFV5-1F  | ACAGACTCGGAGATTGAATATGTGAGG          | 182-1106   | 58 |
|                                             | RsFV5-1R  | AGGTCATACCTGCTGCTGAAACG              |            | 57 |
|                                             | RsFV5-2F  | CCGTTTCAGCAGCAGGTATG                 | 1083-2732  | 54 |
|                                             | RsFV5-2R  | GGCTCCAAATTCAGTTGACTCTT              |            | 53 |
|                                             | RsFV5-3F  | ATGTCTACAACCAATCGCAAATC              | 1323-3196  | 52 |
|                                             | RsFV5-3R  | GCAGTGGATGCTCGTGAACC                 |            | 56 |
|                                             | RsFV5-4F  | GCGAGAATTGTGACATGGGTTCA              | 3179-3826  | 55 |
|                                             | RsFV5-4R  | TGACAAGGCCAGGCAACAGAG                |            | 56 |
|                                             | RsFV5-5F  | ACTGAAGAACGGGCGACG                   | 3261-4190  | 53 |
|                                             | RsFV5-5R  | CCATAACACGATAGGGCTGACT               |            | 55 |
|                                             | RsFV5-6F  | GCTTATCCTTGCATCTGTGGTGTTAGTCAGCCCTAT | 4166-5138  | 66 |

|                                                |              |                            |           |    |
|------------------------------------------------|--------------|----------------------------|-----------|----|
| Rhizoctonia solani<br>partitivirus (RsPV10)    | RsFV5-6R     | CCTGTCAAATTCATGCTGGACGT    | 4393-6065 | 55 |
|                                                | RsFV5-7F     | TAGCCAAAGTCATAAAACAAGTCA   |           | 51 |
|                                                | RsFV5-7R     | ATGTGGTCATCGCCATACACT      |           | 52 |
|                                                | RsFV5-8F     | ACGCTTACACCATAACCCACTTT    |           | 53 |
|                                                | RsFV5-8R     | TGCCTGTTCTCAACGCCAT        |           | 51 |
|                                                | RsFV5-9F     | CCCGACTGAGGAAGAAGGCACA     |           | 59 |
|                                                | RsFV5-9R     | GCAAGTGATACTCTAGGCACCACAAC |           | 60 |
|                                                | RsFV5-10F    | ACAACATCATCAGCGGGTCA       |           | 52 |
|                                                | RsFV5-10R    | CTTTTCCTCTAAACTGGACAATACA  |           | 53 |
|                                                | RsPV10-Rd-1F | CACGAAACGCCCTTCAACA        | 162-1134  | 51 |
| Rhizoctonia solani<br>partitivirus 11 (RsPV11) | RsPV10-Rd-1R | GGGGTAGGAGACAGTCGGAAC      |           | 58 |
|                                                | RsPV10-Rd-2F | ATTCATTTGTTACCCTTGACTGG    | 1024-1787 | 52 |
|                                                | RsPV10-Rd-2R | GTCTGGTGAGTTTCCGAATACC     |           | 55 |
|                                                | RsPV10-CP-1F | TCGTCTGGAATAGGTGGAA        | 219-1039  | 52 |
|                                                | RsPV10-CP-1R | CGATGGGCGTGTTGAAGTA        |           | 51 |
|                                                | RsPV10-CP-2F | AAGCCATCTTTACCGACCG        | 953-1623  | 51 |
|                                                | RsPV10-CP-2R | ATTGGGAAGGATTGACACGA       |           | 50 |
|                                                | RsPV10-CP-3F | TTGTCACCGTCACCACCG         | 1130-1786 | 53 |
|                                                | RsPV10-CP-3R | AAGCGAGAAAGATCATTGTTAGAG   |           | 52 |
|                                                | RsPV11-Rd-1F | TAACTCCTCGTTCTGAACCTCCA    | 25-567    | 55 |
| Rhizoctonia solani<br>partitivirus 11 (RsPV11) | RsPV11-Rd-1R | CGAATTTGTTGCCGTGCC         |           | 50 |
|                                                | RsPV11-Rd-2F | TGGGCACGGCAACAAA           | 548-1321  | 46 |
|                                                | RsPV11-Rd-2R | CGATGAGTAAACCAAGACGGATG    |           | 55 |
|                                                | RsPV11-Rd-3F | CTATCATCCGTCTTGTTTACTCATC  | 1318-1835 | 55 |
|                                                | RsPV11-Rd-3R | GTAGTCGTCAGGCCAGGTGC       |           | 58 |
|                                                | RsPV11-CP-1F | TCCACCGTCCCCGCAAAG         | 130-887   | 55 |

|                                             |              |                                   |           |    |
|---------------------------------------------|--------------|-----------------------------------|-----------|----|
| Rhizoctonia solani RNA<br>virus 11 (RsRV11) | RsPV11-CP-1R | CGTGGTGAGGGATGTCGTTCT             |           | 56 |
|                                             | RsPV11-CP-2F | CCAGCCGACTGACCACAA                |           | 53 |
|                                             | RsPV11-CP-2R | ATTCATAACAGAAGAGGCAAACAT          | 843-1750  | 51 |
|                                             | RsRV11-Rd-1F | CTAAGGTGCCAGTCTGGTCTATC           |           | 57 |
|                                             | RsRV11-Rd-1R | CGGTTGTCTTGACCTTGTTCTT            | 15-460    | 53 |
|                                             | RsRV11-Rd-2F | GGAAGACGATCCAGGAAGAAC             |           | 54 |
|                                             | RsRV11-Rd-2R | TGCCATCATCCCGAAAGAC               | 445-1408  | 51 |
|                                             | RsRV11-Rd-3F | CACTTATGCCGTGGTTGATTC             |           | 52 |
|                                             | RsRV11-Rd-3R | CAAACGTGCCTTCCTGAGAC              | 1286-2056 | 54 |
|                                             | RsRV11-HP-1F | AACTAAGGTGCCAGTCGGGTCTATTCAA      |           | 60 |
|                                             | RsRV11-HP-1R | GGCGGTTCTTCTTTCTTCTGGTGTAT        | 11-907    | 60 |
|                                             | RsRV11-HP-2F | CCAGAAGAAAGAAGGAACCGCCAATA        |           | 58 |
|                                             | RsRV11-HP-2R | GGAGGAAAGAATACGGTCTTACTTTGTAGCACA | 886-1608  | 62 |

---
