# Supplementary material for: Six Novel Mycoviruses Containing Positive Single-Stranded RNA and Double-Stranded RNA Genomes Co-Infect a Single Strain of the Rhizoctonia solani AG-3 PT
Source: MDPI journal article supplement (doi:10.3390/v14040813), 2022-04-14
Supplement: s1 [file s1]

**Table S3.** Primers used to determine the terminal sequences of the six mycoviruses (Rhizoctonia solani mitovirus 40, Rhizoctonia solani fusarivirus 4, Rhizoctonia solani fusarivirus 5, Rhizoctonia solani parititivirus 10, Rhizoctonia solani parititivirus 11, and Rhizoctonia solani RNA virus 11) associated with *Rhizoctonia solani* AG-3 PT strain ZJ-2H by rapid amplification of cDNA ends (RACE).

| Primer Name  | Sequence (5'-3')                             | Amplification Target                                                                            | Annealing Temperature (°C) |
|--------------|----------------------------------------------|-------------------------------------------------------------------------------------------------|----------------------------|
| RsMV40-5'    | GATTACGCCAAGCTTGGGGTCGCATTGCACTTTGTGTA       | 5'-UTR of Rhizoctonia solani mitovirus 40 (RsMV40)                                              | 68                         |
| RsMV40-3'    | GATTACGCCAAGCTTTTCTCGTCGCTTGAGTATAAGTTGCC    | 3'-UTR of RsMV40                                                                                | 68                         |
| RsFV4-5'     | GATTACGCCAAGCTTTGTTGTCACTCTCATCCCCAGTCTTC    | 5'-UTR of Rhizoctonia solani fusarivirus 4 (RsFV4)                                              | 69                         |
| RsFV4-3'     | GATTACGCCAAGCTTGGGCTGTTGTGACTGAAGAATCGG      | 3'-UTR of RsFV4                                                                                 | 69                         |
| RsFV5-5'     | GATTACGCCAAGCTTGCTTGAATAGAGACACATCGTCGTGAATC | 5'-UTR of Rhizoctonia solani fusarivirus 5 (RsFV5)                                              | 68                         |
| RsFV5-3'     | GATTACGCCAAGCTTGGAGTGGAACATTGAGATGCGAGA      | 3'-UTR of RsFV5                                                                                 | 68                         |
| RsPV10-Rd-5' | GATTACGCCAAGCTTTTGTGCGGGTGGGTGTTGAAGGGC      | 5'-UTR of double-stranded RNA (dsRNA) 1 segment of Rhizoctonia solani parititivirus 10 (RsPV10) | 71                         |
| RsPV10-Rd-3' | GATTACGCCAAGCTTGATGTGAAGTCCTCAGTTATCGTAATGCG | 3'-UTR of dsRNA1 of RsPV10                                                                      | 68                         |
| RsPV10-CP-5' | GATTACGCCAAGCTTCCAGTGATTCCACCTATTCCACGACGA   | 5'-UTR of dsRNA2 of RsPV10                                                                      | 69                         |
| RsPV10-CP-3' | GATTACGCCAAGCTTCCCTCAATCTTGTCACCGTCACCACC    | 3'-UTR of dsRNA2 of RsPV10                                                                      | 71                         |
| RsPV11-Rd-5' | GATTACGCCAAGCTTGCCAGCGACGAGTCCACTGAAATA      | 5'-UTR of dsRNA1 of Rhizoctonia solani parititivirus 11 (RsPV11)                                | 69                         |
| RsPV11-Rd-3' | GATTACGCCAAGCTTGTTAGCACAACCTCTACCACACGAAGGC  | 3'-UTR of dsRNA1 of RsPV11                                                                      | 69                         |

|              |                                             |                                                              |    |
|--------------|---------------------------------------------|--------------------------------------------------------------|----|
| RsPV11-CP-5' | GATTACGCCAAGCTTTGAGGGATGTCGTTCTCGGCAATGA    | 5'-UTR of dsRNA2 of RsPV11                                   | 69 |
| RsPV11-CP-3' | GATTACGCCAAGCTTGTGGATTCGCCTTCGCTGACGCTA     | 3'-UTR of dsRNA2 of RsPV11                                   | 70 |
| RsRV11-Rd-5' | GATTACGCCAAGCTTCATTAGCAAACAAACACCTCACA      | 5'-UTR of dsRNA1 of Rhizoctonia<br>solani RNA Virus (RsRV11) | 64 |
| RsRV11-Rd-3' | GATTACGCCAAGCTTGATGGAATCGTGGATTGTTATGT      | 3'-UTR of dsRNA1 of RsRV11                                   | 64 |
| RsRV11-HP-5' | GATTACGCCAAGCTTGGCGGTTCTTCTTTCTTCTGGTGTATCT | 5'-UTR of dsRNA2 of RsRV11                                   | 69 |
| RsRV11-HP-3' | GATTACGCCAAGCTTCACGGACTTGTCTTGAGGTGAGTTCTGC | 3'-UTR of dsRNA2 of RsRV11                                   | 70 |

---
