# Supplementary figures and images for: Six Novel Mycoviruses Containing Positive Single-Stranded RNA and Double-Stranded RNA Genomes Co-Infect a Single Strain of the Rhizoctonia solani AG-3 PT
Source: MDPI journal article supplement (doi:10.3390/v14040813), 2022-04-14

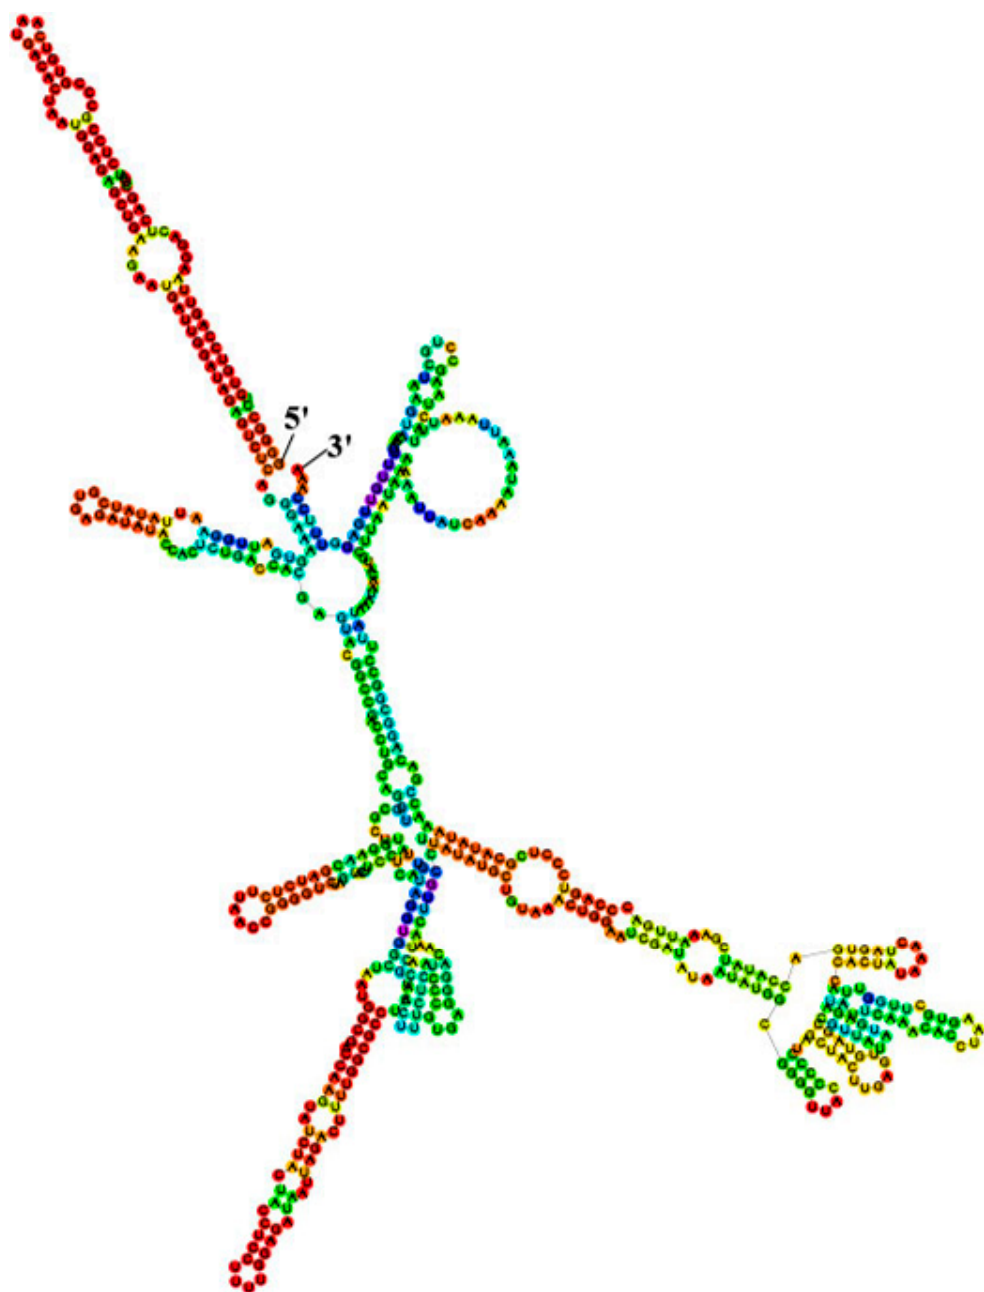

**RsMV40, 5'-terminus**  
 **$\Delta G = -130.60$  kcal/mol**

Supplement: s1 [file s1]

**A**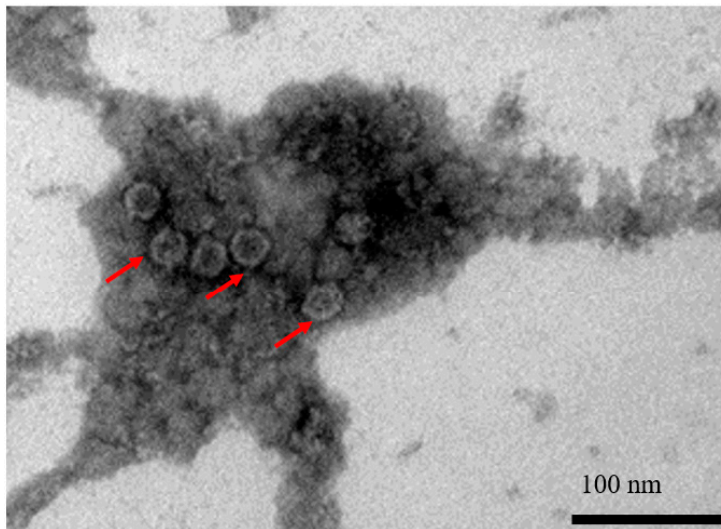**B**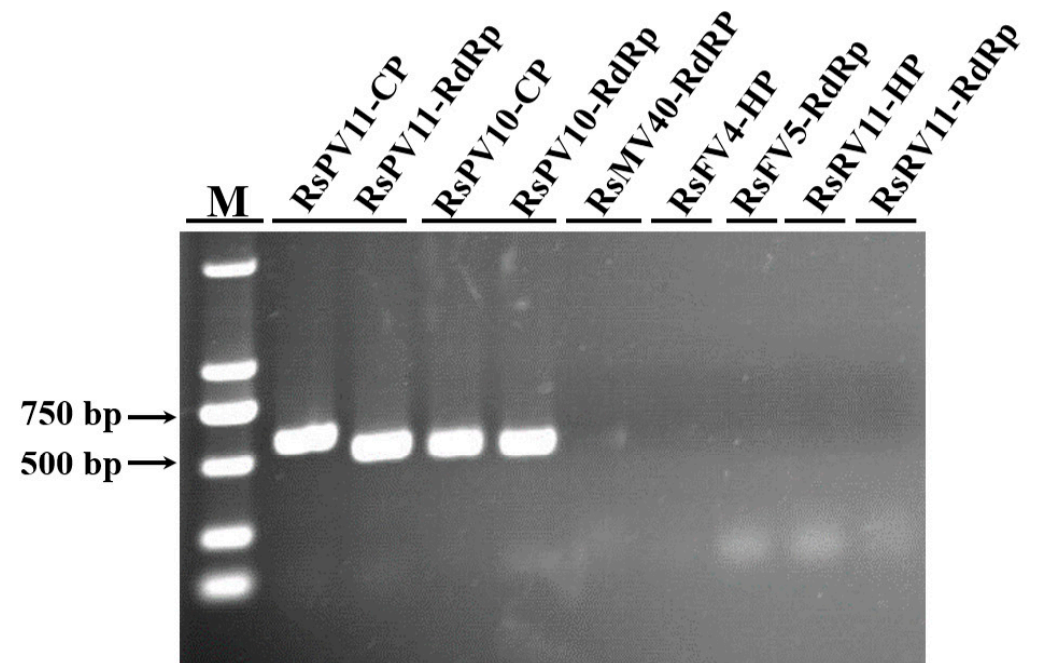

Supplement: s1 [file s1]
